# Supplementary material for: α,α′-Dihydroxyketone formation using aromatic and heteroaromatic aldehydes with evolved transketolase enzymes
Source: Royal Society of Chemistry journal article supplement (doi:10.1039/c0cc02911d), 2010-01-01
Supplement: c0cc02911d.pdf [file c0cc02911d.pdf]

**SUPPORTING INFORMATION:**

**$\alpha,\alpha'$ -Dihydroxyketone formation using aromatic and  
heteroaromatic aldehydes with evolved transketolase  
enzymes**

**James L. Galman,<sup>a</sup> David Steadman,<sup>a</sup> Sarah Bacon,<sup>b</sup> Phattaraporn Morris,<sup>c</sup> Mark E. B. Smith,<sup>a</sup> John  
Ward,<sup>b</sup> Paul A. Dalby<sup>c</sup> and Helen C. Hailes\*<sup>a</sup>**

<sup>a</sup> *Department of Chemistry, University College London, 20 Gordon Street, London WC1H 0AJ, UK. Fax: +44 (0)20 7679 7463; Tel: +44 (0)20 7679 4654; E-mail: [h.c.hailes@ucl.ac.uk](mailto:h.c.hailes@ucl.ac.uk)*

<sup>b</sup> *Research Department of Structural & Molecular Biology, University College London, Gower Street, London WC1E 6BT, UK*

<sup>c</sup> *Department of Biochemical Engineering, University College London, Torrington Place, London WC1E 7JE, UK.*

## General methods

Unless otherwise noted, solvents and reagents were reagent grade from commercial suppliers (Sigma-Aldrich) and used without further purification. Dry  $\text{CH}_2\text{Cl}_2$  was obtained using anhydrous alumina columns.<sup>1</sup> All moisture-sensitive reactions were performed under a nitrogen or argon atmosphere using oven-dried glassware. Reactions were monitored by TLC on Kieselgel 60 F<sub>254</sub> plates with detection by UV, potassium permanganate and phosphomolybdic acid (PMA) [PMA hydrate (12 g) and ethanol (250 mL)] stains. Flash column chromatography was carried out using silica gel (particle size 40-63  $\mu\text{m}$ ). <sup>1</sup>H NMR and <sup>13</sup>C NMR spectra were recorded at the field indicated using Bruker AMX300 MHz, AMX400 Avance-500 MHz and Avance-600 MHz machines. Coupling constants are measured in Hertz (Hz) and unless otherwise specified, NMR spectra were recorded at 298 K. Mass spectra were recorded on a Thermo Finnegan MAT 900XP and Micro Mass Quattro LC electrospray mass spectrometers VG ZAB 2SE. Infrared spectra were recorded on a Shimadzu FTIR-8700 and Perkin Elmer Spectrum 100 FTIR spectrometer. Optical rotations were recorded on a Perkin Elmer model 343 polarimeter at 589 nm, quoted in  $\text{deg cm}^2 \text{g}^{-1}$  and conc (*c*) in g/100 mL. Chiral HPLC analysis was performed on a Varian Prostar instrument equipped with Chiralcel OD or Chiralpak AD chiral columns (Daicel; Chiral Technologies Europe, France) 25 cm  $\times$  0.46 cm.

Lithium hydroxypyruvate was synthesised as previously described.<sup>2</sup> 1,3-dihydroxy-1-phenylpropan-2-one **3a** was prepared as previously described.<sup>3</sup>

**Synthesis of racemic  $\alpha,\alpha'$ -dihydroxyketones.** The corresponding aldehyde **2b–2f** (1.00 mmol) was added to a solution of Li-1 (110 mg, 1.00 mmol) and *N*-methylmorpholine (110  $\mu\text{L}$ , 1.00 mmol) in water (20 mL) at pH 8 (adjusted with 10% HCl). The reaction was stirred for 24–48 h at rt and monitored by TLC analysis. Upon concentration *in vacuo*, the crude material was dry loaded and purified using flash silica chromatography.

**Chiral HPLC analysis of **3a**, **3d–f** to determine *ees*.** Compounds **3d** and **3e** were monobenzoylated (dibenzoylated compounds were not separable by chiral HPLC columns used) and the products analysed by chiral HPLC to determine *ees*.<sup>4</sup> Ketodiols **3a** and **3f** were dibenzoylated for chiral HPLC analysis.<sup>4</sup> HPLC analysis for **3a**, **3d** and **3e** was carried out using a Chiralcel OD column, and for **3f** on a Chiralpak AD column, and the hexane:2-propanol solvent system given.

**1,3-Dihydroxy-1-phenylpropan-2-one<sup>3</sup> (**3a**).** Racemic **3a** was dibenzoylated and HPLC analysis of the product (82:18, 1.0 mL  $\text{min}^{-1}$ ) gave retention times of 10.5 min (*R*-isomer) and 13.4 min (*S*-isomer).

**1-Furan-2-yl-1,3-dihydroxypropan-2-one (3b).** The reaction was carried out for 48 h and the product purified using flash silica chromatography (EtOAc:hexane, 1:1) to give **3b** as a colorless oil (7 mg, 5%);  $\nu_{\max}(\text{neat})/\text{cm}^{-1}$  3391, 1708;  $^1\text{H NMR}$  (300 MHz;  $\text{CDCl}_3$ )  $\delta$  3.39 (2H, s, OH), 4.28 (1H, d,  $J$  19.5, CHHOH), 4.43 (1H, d,  $J$  19.5, CHHOH), 5.30 (1H, s, HOCH), 6.35–6.47 (2H, m), 7.41 (1H, m);  $^{13}\text{C NMR}$  (125 MHz;  $\text{CDCl}_3$ )  $\delta$  66.1 ( $\text{CH}_2$ ), 71.0 (CHOH), 110.5, 111.0, 143.6, 149.6 (CCHOH), 206.9, (C=O);  $m/z$  (HRCI) found  $\text{MH}^+$  157.04964.  $\text{C}_7\text{H}_9\text{O}_4$  requires 157.05008.

**1,3-Dihydroxy-1-(thiophen-2-yl)propan-2-one (3c).** The reaction was carried out for 48 h and the product purified using flash silica chromatography (EtOAc:hexane, 1:1) to give **3c** as a brown oil (8 mg, 5%);  $\nu_{\max}(\text{neat})/\text{cm}^{-1}$  3391, 1708, 694;  $^1\text{H NMR}$  (500 MHz;  $\text{CDCl}_3$ )  $\delta$  3.86 (1H, s, OH), 4.36 (1H, d,  $J$  19.5, CHHOH), 4.42 (1H, d,  $J$  19.5, CHHOH), 5.52 (1H, s, HOCH), 7.01–7.10 (2H, m), 7.35 (1H, m);  $^{13}\text{C NMR}$  (125 MHz;  $\text{CDCl}_3$ )  $\delta$  65.2 ( $\text{CH}_2$ ), 73.1 (CHO), 126.6, 127.1, 127.5, 140.1, 207.8, (C=O);  $m/z$  (HRCI) found  $\text{M}^+$  173.02695.  $\text{C}_7\text{H}_9\text{O}_3\text{S}$  requires 173.02724.

**1,3-Dihydroxy-4-phenylbutan-2-one<sup>5</sup> (3d).** The reaction was carried out for 48 h and the product purified using flash silica chromatography (EtOAc:hexane, 1:1) to give **3d** as a white solid (27 mg, 15%); M.p. 122–130 °C (EtOAc:hexane);  $\nu_{\max}(\text{neat})/\text{cm}^{-1}$  3262, 2966–2883, 1720;  $^1\text{H NMR}$  (300 MHz;  $\text{CDCl}_3$ )  $\delta$  2.85 (1H, dd,  $J$  14.0 and 7.9, CHHPh) 3.08 (1H, dd,  $J$  14.0 and 4.6, CHHPh), 4.28 (1H, d,  $J$  18.0, CHHOH), 4.38 (1H, d,  $J$  18.0, CHHOH), 4.47 (1H, m, CHOH), 7.18–7.34 (5H, m, Ar);  $^{13}\text{C NMR}$  (125 MHz;  $\text{CDCl}_3$ )  $\delta$  40.4 ( $\text{CH}_2\text{Ph}$ ), 66.3 ( $\text{CH}_2\text{OH}$ ), 76.1 (CHOH), 127.4, 128.7, 129.3, 135.6, 211.2 (C=O);  $m/z$  (FTMS) found  $[\text{2M}+\text{Na}]^+$  383.1454.  $\text{C}_{20}\text{H}_{24}\text{O}_6\text{Na}$  requires 383.1471. Racemic **3d** was monobenzoylated and HPLC analysis of the product (97:3, 0.8 mL min<sup>-1</sup>) gave retention times of 45.2 min (3*R*-isomer) and 57.0 min (3*S*-isomer).

**1,3-Dihydroxy-4-phenyl-pentan-2-one (3e).** The reaction was carried out for 48 h and the product purified using flash silica chromatography (EtOAc:hexane, 1:1) to give **3e** as a white solid (25 mg, 13%); M.p. 120–130 °C (EtOAc:hexane);  $\nu_{\max}(\text{neat})/\text{cm}^{-1}$  3407, 2925–2855, 1720; **Isomer 1**  $^1\text{H NMR}$  (300 MHz;  $\text{CDCl}_3$ )  $\delta$  1.27 (3H, d,  $J$  7.1,  $\text{CH}_3$ ), 3.20 (1H, m,  $\text{CHCH}_3$ ), 4.19 (1H, d,  $J$  19.8, CHHOH), 4.27 (1H, d,  $J$  19.8, CHHOH), 4.33 (1H, d,  $J$  4.5, CHOH), 7.21–7.37 (5H, m, Ar);  $^{13}\text{C NMR}$  (125 MHz;  $\text{CDCl}_3$ )  $\delta$  14.3 ( $\text{CH}_3$ ), 43.6 ( $\text{CHCH}_3$ ), 127.4, 127.7, 129.0, 142.0, 211.5 (C=O); **Isomer 2**  $^1\text{H NMR}$  (300 MHz;  $\text{CDCl}_3$ )  $\delta$  1.42 (3H, d,  $J$  7.1,  $\text{CH}_3$ ) 3.24 (1H, m,  $\text{CHCH}_3$ ), 4.06 (1H, d,  $J$  19.5, CHHOH), 4.33–4.40 (2H, m, CHHOH and CHOH), 7.21–7.37 (5H, m, Ar);  $m/z$  (FTMS) found  $\text{MNa}^+$  217.0836.  $\text{C}_{11}\text{H}_{14}\text{O}_3\text{Na}$  requires 217.0835. The **3e** isomers were monobenzoylated and HPLC analysis of the product (97:3, 0.8 mL min<sup>-1</sup>) gave retention times of approximately 20.0 min, 21.4 min, 24.3 min, and 26.2 min. Aldehyde **2*R*-2e** was synthesised as previously described.<sup>6</sup> When used in the biomimetic reaction above, followed by monobenzylation, HPLC analysis revealed that

the peaks at retention times of 20.0 min and 26.2 min (peaks 1 and 4) were enhanced significantly indicating these corresponded to **3e**-(3*RS*,4*R*).

**1,3-Dihydroxy-1-(3-hydroxyphenyl)propan-2-one (3f).** The reaction was carried out for 48 h and the product purified using flash silica chromatography (EtOAc:hexane, 1:1) to give **3f** as a colorless oil (10 mg, 4%).  $\nu_{\max}(\text{neat})/\text{cm}^{-1}$  3407, 2925–2855, 1720;  $^1\text{H NMR}$  (600 MHz;  $\text{CD}_3\text{OD}$ )  $\delta$  4.32 (1H, d,  $J$  19.0, *CHHOH*), 4.37 (1H, d,  $J$  19.0, *CHHOH*), 5.18 (1H, s, *CHOH*), 6.73 (1H, dd,  $J$  8.1 and 1.8, 4'-H), 6.84 (1H, br s, 2'-H), 6.87 (1H, d,  $J$  7.7, 6'-H), 7.18 (1H, app t,  $J$  7.9, 5'-H);  $^{13}\text{C NMR}$  (125 MHz;  $\text{CD}_3\text{OD}$ )  $\delta$  65.0 ( $\text{CH}_2\text{OH}$ ), 77.1 (*CHOH*), 114.5, 119.9, 123.0, 131.0, 137.7, 156.5, 211.0 (*C=O*);  $m/z$  (FTMS) found  $\text{MH}^+$  183.06632.  $\text{C}_9\text{H}_{11}\text{O}_4$  requires 183.06730. Racemic **3f** was dibenzoylated and HPLC analysis of the product (80:20, 1.0 mL  $\text{min}^{-1}$ ) gave retention times of 12.9 min (3*S*-isomer) and 17.1 min (3*R*-isomer).

**Mutant F434A.** Site-directed mutagenesis for the F434A TK mutant was performed using the Quikchange kit (Stratagene, Netherlands), forward (5'-CGTACACACCTCCACCGCCCTGATGTTTCGTGG-3') and reverse (5'-CCACGAACATCAGGGCGGTGGAGGTGTACG-3') primers,<sup>7</sup> and plasmid template pQR706 which harbours the *E. coli tkta* gene complete with its natural promoter. The resulting pQR780 plasmid was transformed into supercompetent XL1-Blue (Stratagene) *Epicurian coli* cells, and subsequently re-transformed into JM107 *E. coli* cells for activity measurements.

**TK conversions.** The TK cell free lysates were prepared using an identical procedure to that previously described.<sup>4</sup> The biotransformations were conducted at 50 mM reaction concentrations. ThDP (22 mg, 48  $\mu\text{mol}$ ) and  $\text{MgCl}_2 \cdot 6\text{H}_2\text{O}$  (39 mg, 180  $\mu\text{mol}$ ) were dissolved in  $\text{H}_2\text{O}$  (10 mL) and the pH adjusted to 7 using 0.1 M NaOH. To this stirred solution, at 25 °C, was added TK clarified lysate (2 mL, containing approximately 0.3 mg  $\text{mL}^{-1}$  of TK) and the mixture stirred for 20 min. In another flask, Li-1 (110 mg, 1.00 mmol) and the aldehyde (1.00 mmol) were dissolved in  $\text{H}_2\text{O}$  (8 mL) and the pH adjusted to 7 with 0.1 M NaOH. Following the 20 min enzyme/cofactor pre-incubation, the Li-1/aldehyde mixture (**2a-2f**) was added to the enzyme solution and the mixture stirred at rt for 24 h. During this time, the pH was maintained at 7.0 by addition of 1 M HCl using a pH stat (Stat Titrino, Metrohm) and the reactions were followed by TLC analysis. Silica was added and the reaction mixture concentrated to dryness, dry loaded onto a flash silica gel column, and purified. The *ees* were determined from the mono/dibenzoylated procedure given above.

**TK formation of 1,3-dihydroxy-1-phenylpropan-2-one (3a).** WT-TK gave no **3a**; D469E-TK gave **3a** (3 mg, 2%) as a racemate and 5% of **4**; D469T-TK gave **3a** (3 mg, 2%) in 70% *ee* (3*R*-isomer) and 5% of **4**; D469K-TK gave **3a** (3 mg, 2%) in 82% *ee* (3*R*-isomer) and 5% of **4**, and F434A-TK generated **3a** (16 mg, 10%) in 82% *ee* (3*R*-isomer) as a colorless oil;  $[\alpha]_{\text{D}}^{20} = +74.0$  (c

0.5, CHCl<sub>3</sub>). Data for **1,3,4,5-Tetrahydroxy-3-phenylpentan-2-one (4, R = Ph)**. The biotransformation side product (**4**) was generated using the D469-TK mutants as a mixture of isomers (11 mg, 5%) as an oil.  $\nu_{\max}(\text{neat})/\text{cm}^{-1}$  3391, 1684; <sup>1</sup>H NMR (500 MHz; CD<sub>3</sub>OD)  $\delta$  3.05 (0.6H, d, *J* 11.1, CHHOH), 3.73–3.78 (1.4H, m, CHHOHs and CHHOHs), 3.96 (0.4H, d, *J* 11.1, CHHOH), 4.34 (0.4H, d, *J* 11.1, CHHOH), 4.60 (0.6H, d, *J* 19.4, CHHOH), 4.65 (0.6H, d, *J* 19.4, CHHOH), 4.81 (1H, m, CHOH), 7.24–7.32 (3H, m, Ph), 7.40 (2H, dd, *J* 8.0 and 1.2, Ph); <sup>13</sup>C NMR (150 MHz; CD<sub>3</sub>OD)  $\delta$  67.0 and 67.4 (CH<sub>2</sub>), 68.8 and 69.1 (CH<sub>2</sub>), 76.6 and 76.7 (CH), 86.2 and 86.8, 128.8–129.0 (signals superimposed), 141.2 and 141.3, 214.6 and 215.4 (C=O); *m/z* (HRCI) found MH<sup>+</sup> 227.09110. C<sub>11</sub>H<sub>15</sub>O<sub>5</sub> requires 227.09195.

The absolute stereochemistry of **3a** generated using F434A-TK was determined using the Mosher's derivatisation method (both Mosher's esters formed).<sup>8</sup>

**(2*S*,3'*R*)-3,3,3-Trifluoro-2-methoxy-2-phenyl propionic acid 3'-hydroxy-2'-oxo-3'-phenylpropyl ester**. The reaction was carried out under anhydrous conditions. To a stirred solution of F434A-TK generated **3a** (0.008 g, 0.05 mmol) in CH<sub>2</sub>Cl<sub>2</sub> (1 mL) was added triethylamine (34  $\mu$ L, 0.25 mmol) and (*R*)-MTPA chloride (10  $\mu$ L, 0.04 mmol) the reaction was stirred for 12 h at rt. The product was dry loaded onto silica gel and purified using flash chromatography (EtOAc:hexane, 1:4) to afford the titled compound as a colourless oil (0.016 g, 84%). *R<sub>f</sub>* 0.40 (EtOAc:hexane, 1:4);  $[\alpha]_{\text{D}}^{25} = +12.0$  (*c* 0.25, CHCl<sub>3</sub>);  $\nu_{\max}(\text{neat})/\text{cm}^{-1}$  3420, 2930, 2855, 1734; <sup>1</sup>H NMR (300 MHz; CDCl<sub>3</sub>)  $\delta$  3.61 (3H, s, OCH<sub>3</sub>), 4.70 (0.17H, d, *J* 17.0, CHHO (2*R*,3'*R*)), 4.84 (0.83H, d, *J* 17.0, CHHO (2*S*,3'*R*)), 4.92 (0.83H, d, *J* 17.0, CHHO (2*S*,3'*R*)), 5.02 (0.17H, d, *J* 17.0, CHHO (2*R*,3'*R*)), 5.26 (1H, s, CHOH), 7.32–7.43 (8H, m, Ar), 7.58 (2H, m, Ar); <sup>13</sup>C NMR (150 MHz; CDCl<sub>3</sub>)  $\delta$  55.9 (OCH<sub>3</sub>), 66.5, 78.1 (CHOH), 127.4, 127.5, 128.6, 129.5, 129.6, 130.0, 131.7, 136.8, 166.2 (C=O ester), 201.6 (C=O, ketone); <sup>19</sup>F NMR (282 MHz; CDCl<sub>3</sub>)  $\delta$  -72.2; *m/z* (HRCI) found MH<sup>+</sup> 383.11154. C<sub>19</sub>H<sub>18</sub>F<sub>3</sub>O<sub>5</sub> requires 383.11063.

**(2*R*,3'*R*)-3,3,3-Trifluoro-2-methoxy-2-phenyl propionic acid 3'-hydroxy-2'-oxo-3'-phenylpropyl ester**. The reaction was carried out under anhydrous conditions. To a stirred solution of F434A-TK generated **3a** (0.008 g, 0.05 mmol) in CH<sub>2</sub>Cl<sub>2</sub> (1 mL) was added triethylamine (34  $\mu$ L, 0.25 mmol) and (*R*)-MTPA chloride (10  $\mu$ L, 0.04 mmol) the reaction was stirred for 12 h at rt. The product was dry loaded onto silica gel and purified using flash chromatography (EtOAc:hexane, 1:4) to afford the titled compound as a colourless oil (0.016 g, 84%). *R<sub>f</sub>* 0.40 (EtOAc:hexane, 1:4);  $[\alpha]_{\text{D}}^{25} = +30.0$  (*c* 0.5, CHCl<sub>3</sub>);  $\nu_{\max}(\text{neat})/\text{cm}^{-1}$  3420, 2930, 2855, 1734; <sup>1</sup>H NMR (300 MHz; CDCl<sub>3</sub>)  $\delta$  3.61 (3H, s, OCH<sub>3</sub>), 4.69 (0.93H, d, *J* 17.0, CHHO (2*R*,3'*R*)), 4.84 (0.07H, d, *J* 17.0, CHHO (2*S*,3'*R*)), 4.91 (0.07H, d, *J* 17.0, CHHO (2*S*,3'*R*)), 5.02 (0.93H, d, *J* 17.0, CHHO (2*R*,3'*R*)), 5.25 (1H, s, CHOH), 7.25–7.60 (8H, m, Ar), 7.59 (2H, m, Ar); <sup>13</sup>C NMR (150 MHz; CDCl<sub>3</sub>)  $\delta$  55.9

(OCH<sub>3</sub>), 66.5, 78.1 (CHOH), 127.4, 127.5, 128.6, 129.5, 129.6, 130.0, 131.8, 136.7, 166.3 (C=O ester), 201.7 (C=O, ketone); <sup>19</sup>F NMR (282 MHz; CDCl<sub>3</sub>) δ -72.2; *m/z* (HRCI) found MH<sup>+</sup> 383.11154. C<sub>19</sub>H<sub>18</sub>F<sub>3</sub>O<sub>5</sub> requires 383.11063.

**TK formation of 1-furan-2-yl-1,3-dihydroxypropan-2-one (3b).** WT-TK gave no **3b**; D469E-TK gave **3b** (8 mg, 5%) and **5** (R = furyl) in <2%; D469T-TK gave **3b** (5 mg, 3%) and **5** (R = furyl) in <2%; D469K-TK gave **3b** (5 mg, 3%) and **5** (R = furyl) in <2%, and F434A-TK generated **3b** (2 mg, 1%) as a colorless oil and **5** (R = furyl) in <2%. [ $\alpha$ ]<sub>D</sub><sup>20</sup> of **3b** = +54.0 (*c* 0.4, CHCl<sub>3</sub>).

Data for **1-Furan-2-yl-2,3-dihydroxy-propan-1-one (5, R = furyl)**. The biotransformation side product (**5**) was generated using the D469 and F434-TK mutants (3 mg, 2%) as an oil.  $\nu_{\max}(\text{neat})/\text{cm}^{-1}$  3391, 1708; <sup>1</sup>H NMR (300 MHz; CDCl<sub>3</sub>) δ 3.93 (1H, dd, *J* 11.8 and 4.5, CHHOH), 4.06 (1H, dd, *J* 11.8 and 3.3, CHHOH), 4.91 (1H, m, CHOH), 6.60 (1H, m, Ar), 7.37 (1H, m, Ar), 7.64 (1H, m, Ar); <sup>13</sup>C NMR (150 MHz; CD<sub>3</sub>OD) δ 64.9 (CH<sub>2</sub>), 74.8 (CHO), 112.8, 119.5, 147.4, 150.3, 187.7 (C=O); *m/z* (HRCI) found M<sup>+</sup> 157.04964. C<sub>7</sub>H<sub>9</sub>O<sub>4</sub> requires 157.05008.

**TK formation of 1,3-dihydroxy-1-(thiophen-2-yl)propan-2-one (3c).** WT-TK gave no **3c**; D469E-TK gave **3c** (4 mg, 2%) and **5** (R = thienyl) in <2%; D469T-TK gave **3c** (5 mg, 3%) and **5** (R = thienyl) in <2%; D469K-TK gave **3c** (4 mg, 2%) and **5** (R = thienyl) in <2%, and F434A-TK gave **3c** (2 mg, 1%) as an oil and **5** (R = furyl) in <2%. [ $\alpha$ ]<sub>D</sub><sup>20</sup> of **3c** = +26.0 (*c* 0.15, CHCl<sub>3</sub>).

Data for **2,3-Dihydroxy-1-thiophen-2-yl-propan-1-one (5, R = thienyl)**. The biotransformation side product (**5**) was generated using the D469 and F434-TK mutants (3 mg, 2%) as an oil.  $\nu_{\max}(\text{neat})/\text{cm}^{-1}$  3391, 1708; <sup>1</sup>H NMR (300 MHz; CDCl<sub>3</sub>) δ 3.86 (1H, dd, *J* 11.7 and 5.1, CHHOH), 4.05 (1H, dd, *J* 11.7 and 3.3, CHHOH), 4.97 (1H, m, CHOH), 7.20 (1H, app t, *J* 4.5, Ar), 7.76 (1H, d, *J* 5.0, Ar), 7.82 (1H, d, *J* 4.0, Ar); <sup>13</sup>C NMR (150 MHz; CD<sub>3</sub>OD) δ 66.2 (CH<sub>2</sub>), 75.3 (CHO), 128.6, 133.5, 135.5, 139.7, 191.8 (C=O); *m/z* (HRCI) found M<sup>+</sup> 173.02695. C<sub>7</sub>H<sub>9</sub>O<sub>3</sub>S requires 173.02724.

**TK formation of 1,3-dihydroxy-4-phenylbutane-2-one (3d).** WT-TK gave **3d** (9 mg, 5%) in 93% *ee* (3*S*-isomer); D469E-TK gave **3d** (77 mg, 43%) in 90% *ee* (3*S*-isomer); D469T-TK gave **3d** (90 mg, 50%) in 96% *ee* (3*S*-isomer); D469K-TK gave **3d** (81 mg, 45%) in 95% *ee* (3*S*-isomer), and F434A-TK generated **3d** (86 mg, 48%) in 97% *ee* (3*S*-isomer) as a white solid. M.p. 122-130 °C; [ $\alpha$ ]<sub>D</sub><sup>20</sup> = +30.0 (*c* 0.5, CHCl<sub>3</sub>).

The absolute stereochemistry of **3d** generated using D469E-TK was determined using the Mosher's derivatisation method.<sup>8</sup>

**(2*S*,3'*S*)-3,3,3-Trifluoro-2-methoxy-2-phenyl propionic acid 3'-hydroxy-2'-oxo-4'-phenylbutyl ester.** The reaction was carried out under anhydrous conditions. To a stirred solution of synthesized

D469E **3d** (0.01 g, 0.04 mmol) in CH<sub>2</sub>Cl<sub>2</sub> (1 mL) was added triethylamine (34 μL, 0.25 mmol) and (*R*)-MTPA chloride (10 μL, 0.04 mmol) and the reaction was stirred for 12 h at rt. The product was dry loaded onto silica gel and purified using flash chromatography (EtOAc:hexane, 1:4) to afford the titled compound as a colourless oil (0.015 g, 85%). *R*<sub>f</sub> 0.40 (EtOAc:hexane, 1:4); [α]<sup>25</sup><sub>D</sub> = -30.0 (*c* 0.3, CHCl<sub>3</sub>); *v*<sub>max</sub>(neat)/cm<sup>-1</sup> 3600, 2932, 1759, 1737; <sup>1</sup>H NMR (300 MHz; CDCl<sub>3</sub>) δ 2.59 (1H, d, *J* 4.0 Hz, *OH*) 2.91 (1H, dd, *J* 14.1 and 8.6, PhCHH,) 3.17 (1H, dd, *J* 14.1 and 4.4, PhCHH) 3.66 (1H, s, OCH<sub>3</sub>), 4.50 (1H, m, CHOH) 4.95 (0.95H, d, *J* 17.4, CHHO (2*S*,3'*S*)), 5.03 (0.05H, d, *J* 17.4, CHHO (2*R*,3'*S*)), 5.09 (0.05H, d, *J* 17.4, CHHO (2*R*,3'*S*)), 5.16 (0.95H, d, *J* 17.4, CHHO (2*S*,3'*S*)), 7.21–7.42 (5H, m), 7.43 (3H, m), 7.63 (2H, m); <sup>13</sup>C NMR (125 MHz; CDCl<sub>3</sub>) δ 40.2 (CH<sub>2</sub>Ar), 55.8 (OCH<sub>3</sub>), 67.8 (CH<sub>2</sub>O), 76.7 (CHOH), 127.5, 127.6, 128.5, 129.0, 129.5, 129.9, 131.9, 135.6, 166.3 (C=O ester), 203.5 (C=O, ketone); <sup>19</sup>F NMR (282 MHz; CDCl<sub>3</sub>) δ -72.2; *m/z* (-HRES) found [M-H] 395.1119. C<sub>20</sub>H<sub>19</sub>F<sub>3</sub>O<sub>5</sub> requires 395.1106.

**TK formation of 1,3-dihydroxy-4-phenylbutane-2-one (3e).** Using racemic **2e** WT-TK gave **3e** (68 mg, 35%) with 88% (3*S*,4*R*) and 12% (3*S*,4*S*); D469E-TK gave **3e** (59 mg, 30%) with 95% (3*S*,4*R*) and 5% (3*S*,4*S*); D469T-TK gave **3e** (78 mg, 40%) with 95% (3*S*,4*R*) and 5% (3*S*,4*S*); D469K-TK gave **3e** (73 mg, 38%) with 95% (3*S*,4*R*) and 5% (3*S*,4*S*), and F434A-TK gave **3e** (68 mg, 35%) with 85% (3*S*,4*R*) and 15% (3*S*,4*S*) as a white solid. M.p. 120-130 °C; [α]<sup>25</sup><sub>D</sub> = +30.9 (*c* 0.22, CHCl<sub>3</sub>). Major isomer by <sup>1</sup>H NMR is isomer 1 from the biomimetic reaction. (2*R*)-**2e** was readily accepted by D469T to give one product in 40% yield, the (3*S*,4*R*)-isomer (with a retention time of approximately 26.2 min (peak 4) using the same HPLC condition as for the biomimetic reaction.

The absolute stereochemistry of **3e** at C-3 generated using D469E-TK was determined using the Mosher's derivatisation method.<sup>8</sup>

**(2*S*,3'*S*,4'*S*)-3'-hydroxy-2'-oxo-4'-phenylpentyl-3,3,3-trifluoro-2-methoxy-2-phenylpropanoate.** The reaction was carried out under anhydrous conditions. To a stirred solution of synthesized D469E **3e** (0.012 g, 0.06 mmol) in CH<sub>2</sub>Cl<sub>2</sub> (1 mL) was added triethylamine (34 μL, 0.25 mmol) and (*R*)-MTPA chloride (10 μL, 0.04 mmol) the reaction was stirred for 12 h at rt. The product was dry loaded onto silica gel and purified using flash chromatography (hexane: EtOAc, 4:1) to afford the titled compound as a colourless oil (0.018 g, 75%), *R*<sub>f</sub> 0.45 (hexane: EtOAc, 4:1); [α]<sup>25</sup><sub>D</sub> = -37.2 (*c* 0.25, CHCl<sub>3</sub>); *v*<sub>max</sub>(neat)/cm<sup>-1</sup> 3471, 2954, 1759, 1735, 1170; <sup>1</sup>H NMR (300 MHz; CDCl<sub>3</sub>) δ 1.32 (3H, d, *J* 7.1, CHCH<sub>3</sub>), 1.59 (1H, br, *OH*), 3.27 (1H, m, CHCH<sub>3</sub>), 3.65 (1H, s, OCH<sub>3</sub>), 4.40 (1H, d, *J* 3.9, CHOH) 4.87 (1H, d, *J* 17.0, CHHO (2*S*,3'*S*)), 4.96 (trace 2*S*,3'*R*-isomer), 5.04 (1H, d, *J* 17.0, CHHO (2*S*,3'*S*)), 7.21–7.42 (5H, m), 7.43 (3H, m, Ph), 7.63 (2H, m, Ph); <sup>13</sup>C NMR (125 MHz; CDCl<sub>3</sub>) δ 13.8, 43.2, 55.8 (OCH<sub>3</sub>), 68.5 (CH<sub>2</sub>), 80.1 (CHOH), 127.4,

127.8, 128.5, 129.0, 129.9, 129.9, 131.9, 142.0, 166.2 (C=O ester), 203.7 (C=O, ketone);  $^{19}\text{F}$  NMR (282 MHz;  $\text{CDCl}_3$ )  $\delta$  -72.3;  $m/z$  (HRMS) found  $\text{MH}^+$  433.1234.  $\text{C}_{21}\text{H}_{21}\text{F}_3\text{O}_5$  requires 433.1239.

**TK formation of 1,3-dihydroxy-1-(3-hydroxyphenyl)propan-2-one (3f).** WT-TK and D469E-TK gave no **3f**; D469T-TK gave **3f** (7 mg, 4%) as a racemate, and F434A-TK gave **3f** (11 mg, 6%) in 53% *ee* (3*R*-isomer) as a colorless oil.  $[\alpha]_{\text{D}}^{25} = +99.3$  (*c* 0.08, MeOH).

The absolute stereochemistry of **3f** using F434A-TK was determined using the Mosher's derivatisation method.<sup>8</sup>

**(2*R*,3'*R*)-3-(1-Hydroxy-2-oxo-3-(((2*R*)-3,3,3-trifluoro-2-methoxy-2-phenylpropanoyl)oxy)-propyl]phenyl-3,3,3-trifluoro-2-methoxy-2-phenylpropanoate.** To a stirred solution of 1,3-dihydroxy-1-(3-hydroxyphenyl)propan-2-one (3 mg, 0.02 mmol) in  $\text{CH}_2\text{Cl}_2$  (2 mL) was added 2,4,6-collidine (10  $\mu\text{L}$ , 0.08 mmol) and (*S*)-MTPA chloride (10  $\mu\text{L}$ , 0.04 mmol). The reaction was stirred for 36 h at rt. The product was dry loaded onto silica gel and purified using flash silica chromatography (EtOAc:hexane, 3:7) to afford the titled compound as a colourless oil (1 mg, 8%).  $R_f$  0.14 (EtOAc:hexane, 3:7).  $\nu_{\text{max}}(\text{neat})/\text{cm}^{-1}$  3420, 2930, 2855, 1734;  $^1\text{H}$  NMR (600 MHz;  $\text{CDCl}_3$ )  $\delta$  3.62 (6H, s,  $\text{OCH}_3$ ), 4.74 (0.4H, d,  $J$  16.9,  $\text{CHHO}$  (2*R*,3'*R*,2''*R*)), 4.90 (0.2H, m,  $\text{CHHO}$  (2*R*,3'*S*,2''*R*)), 5.02 (0.4H, d,  $J$  16.9,  $\text{CHHO}$  (2*R*,3'*R*,2''*R*)), 5.20 (1H, d,  $J$  3.8,  $\text{CHOH}$ ), 7.25–7.60 (14H, m, Ar);  $^{13}\text{C}$  NMR (150 MHz;  $\text{CDCl}_3$ )  $\delta$  55.9 ( $\text{OCH}_3$ ), 66.5 ( $\text{CH}_2$ ), 77.1 ( $\text{CHOH}$ ), 127.3, 127.5, 128.6–129.0 (signals superimposed), 130.0, 130.9, 138.5, 156.4, 166.6 (C=O esters), 201.8 (C=O, ketone);  $^{19}\text{F}$  NMR (282 MHz;  $\text{CDCl}_3$ )  $\delta$  -72.2;  $m/z$  (ES+) found  $\text{MH}^+$  615.09.  $\text{C}_{29}\text{H}_{25}\text{F}_6\text{O}_8$  requires 615.13.

## References

1. F. Dickens, *Biochemical Prep.* 1962, **9**, 86.
2. E. Racker in *The Enzymes*, Vol. 5 (Eds.: P. D. Boyer, H. Lardy, K. Myrzbach), Academic Press, New York, **1961**, pp. 397.
3. M. E. B. Smith, K. Smithies, T. Senussi, P. A. Dalby and H. C. Hailes, *Eur. J. Org. Chem.* 2006, **5**, 1121.
4. A. Cázares, J. L. Galman, L. G. Crago, M. E. B. Smith, J. Strafford, L. Ríos-Solís, G. L. Lye, P. A. Dalby, H. C. Hailes, *Org. Biomol. Chem.*, 2010, **6**, 1301.
5. K. G. Morris, M. E. B. Smith, N. J. Turner, M. D. Lilly, R. K. Mitra and J. M. Woodley, *Tetrahedron: Asymmetry*, 1996, **7**, 2185.
6. C. Botuha, M. Haddad, M. Larchevêque, *Tetrahedron: Asymmetry*. 1998, **9**, 1929.



7. S. Bacon, Ph.D Thesis UCL, **2001**.
8. J. L. Galman and H. C. Hailes, *Tetrahedron: Asymmetry*, 2009, **20**, 1828.
